# Supplementary material for: Loss of RANKL in osteocytes dramatically increases cancellous bone mass in the osteogenesis imperfecta mouse (oim)
Source: PubMed Central journal article supplement — Bone Rep. 2018 Jul 2;9:61–73. doi: 10.1016/j.bonr.2018.06.008 (PMC6077550; doi:10.1016/j.bonr.2018.06.008), 2018-07-02
Supplement: mmc4.pdf [file mmc4.pdf]

## **Multiple files are bound together in this PDF Package.**

Adobe recommends using Adobe Reader or Adobe Acrobat version 8 or later to work with documents contained within a PDF Package. By updating to the latest version, you'll enjoy the following benefits:

- Efficient, integrated PDF viewing
- Easy printing
- Quick searches

**Don't have the latest version of Adobe Reader?**

**[Click here to download the latest version of Adobe Reader](#)**

**If you already have Adobe Reader 8,  
click a file in this PDF Package to view it.**
